# Supplementary material for: Aberrant MUC1-TRIM46-KRTCAP2 Chimeric RNAs in High-Grade Serous Ovarian Carcinoma
Source: PubMed Central journal article supplement (PMC4695878; doi:10.3390/cancers7040878), 2015-10-19

## Supplementary Materials

**Table S1.** RNA junction sequences of identified chimeric RNAs.

| Chimera                  | RNA Fusion Junction Sequence                                                                                                                                                                                                                                                                    |
|--------------------------|-------------------------------------------------------------------------------------------------------------------------------------------------------------------------------------------------------------------------------------------------------------------------------------------------|
| <i>MUC1-TRIM46</i>       | See Table S5                                                                                                                                                                                                                                                                                    |
| <i>SH2D4A-CSGALNACT1</i> | TTTCCTCATCGATGCCTCTGCAGACGCCTACAGCTTCCTGGGCGTGGACC<br>AGCTACAGCATGCCACCTTGGCGGATTTGGTGAATATCACAAG*GTGAG<br>CCTCTATCTCGTGCCTGAACACCAGCATGCCAGCTGGCCGTGG                                                                                                                                          |
| <i>CCDC19-VSIG8</i>      | CAGCAGAAGGAAGTGCAGAACCGGATTGCCACCTTTGAGGAGGGCCGG<br>CGCCTCAAAGAGGAGGCCAGAAACGCCGTGAGCGCATCGATGAGATC<br>AAGAGGAAAAAGCTTGAAGAGCTGAG*CACTGCTGTCTGCTGTGCGGAT<br>CAACGGGGATGGACAGGAGTCTGTACCTGGCAGAAGGTGATAATGTG<br>AGGCTGGGTGCCCTACGTCTGGACCCTGAGGACTATGGTCCCAATG<br>GGCTGGACATCGAGTGGATGCAGGTCAACT |
| <i>SFPQ-AL831889</i>     | TGGTGGTGGCATAGGTTATGAAGCTAATCCTGGCGTTCACCAGCAACC<br>ATGAGTGGTTCATGATGGGAAGTGACATG*GTAAGAATGATTGATGTTG<br>GCTGATATTGGAGTGCTCATTACATGAAGTGGATAGATACTTCTCAAGA<br>CATCACACAGCGTGAGTCAATCAAGGAGGGAAGCCACAAGCAGACTGA<br>CAACGTTTCTAGGATCAGGTGAGCTGTGTCCAGAAA                                          |
| <i>CS-CNPY2</i>          | CTGCTCACCTTGGTTCCTCAAGAGCCGGGCGGCCGCA*CTCCGACTCAGAT<br>TTTGAACGGATGTTTGCATGTATACCACAGTGCTACATTA AAAACCAGTC<br>ATGTGGATGTGGAGAAGGGTGCTGATCAGGACTCCCTGTTTGCTAACAA<br>ATTCTACAGCAGAAACAAAGTATTAAGGTTTGCAGCCAGGAAGCAAGTG<br>CATGGGGAA                                                               |
| <i>SLC16A3-CSNK1D</i>    | TTCAAGGAGCTCATA CAGGAGTTTGGGATCGGCTACAGCGACACAGCCT<br>GGATTCCTCCATCCTGCTGGCCATGCTCTACGGGACAG*GGGTCTGCT<br>GTCACCCAGGCTGGAAGGCAGTGGCACCATCACAGCTCCCTGCAGCCTT<br>AACCTCCCGAACTCTAGCCATCCTCCTGCCTCAGCCTCCAGAGTAGCTGA<br>GACTACAGATGTAAGC                                                           |
| <i>SPINT2-YIF1B</i>      | CCCACGCTGGTACTTTGACGTGGAGAGGAACTCCTGCAATAACTTCATCT<br>ATGGAGGCTGCCGGGGCAATAAGAACAGCTACCGCTCTGAGGAGGCCT<br>GCATGCTCCGCTGCTTCCGCCAGCAGGAGAATCCTCCCTGCCCTTGGC<br>TCAAAGG*CCCTGGAGCCCACCTCCCAGAAGCCCGGTGTGGG                                                                                        |
| <i>CTSC-RAB38</i>        | TTGCCAACATCTTGGGACTGGAGAAATGTTTCATGGTATCAATTTGTCAG<br>TCCTGTTCGAAACCAAG*GTCAAGAAAGATTTGGAAACATGACGAGGGT<br>CTATTACCGAGAAGCTATGGGTGCATTTATTGTCTTCGATGTCACCAGGC<br>CAGCCACATTTGAAGCAGTGGCAAAGTGGAAAA                                                                                              |
| <i>JAK3-INSL3</i>        | CCGCCTCTTGGAACTGCTGGAGGAGGGCCAGAGGCTGCCGGCGCCTCCT<br>GCCTGCCCTGCTGAG*GTGAGTTGCTACAGTGGCTGGAGAGACGACATCT<br>GCTCCATGGGCTGGTGGCCGACAGTAATCTCACGCT                                                                                                                                                 |

The nine validated chimeric RNAs along with their RNA fusion junctions are shown. The RNA fusion junction is represented by “\*”.

**Table S2.** Recurrence profile of identified chimeric RNAs. The validated chimeric RNAs are shown along with their recurrence in the 130 TCGA sample cohort by bioinformatics analysis. Since TCGA transcriptome sequencing collection does not contain organ specific controls, we examined these nine chimeric RNAs using our in-house non-cancerous ovary samples by RT-PCR to answer the question of whether these candidates are also present in non-cancerous tissue.

| Chimera                  | Type             | Chromosome | Recurrence among 130 TCGA Samples | Recurrence among 11 Non-Cancer Donor Ovary Samples |
|--------------------------|------------------|------------|-----------------------------------|----------------------------------------------------|
| <i>MUC1-TRIM46</i>       | Intrachromosomal | 1          | 9                                 | 0                                                  |
| <i>SH2D4A-CSGALNACT1</i> | Intrachromosomal | 8          | 22                                | 11                                                 |
| <i>CCDC19-VSIG8</i>      | Intrachromosomal | 1          | 10                                | 1                                                  |
| <i>SFPQ-AL831889</i>     | Intrachromosomal | 1          | 98                                | 11                                                 |
| <i>CS-CNPY2</i>          | Intrachromosomal | 12         | 23                                | n.d.                                               |
| <i>SLC16A3-CSNK1D</i>    | Intrachromosomal | 17         | 18                                | 5                                                  |
| <i>SPINT2-YIF1B</i>      | Intrachromosomal | 19         | 55                                | 11                                                 |
| <i>CTSC-RAB38</i>        | Intrachromosomal | 11         | 6                                 | 11                                                 |
| <i>JAK3-INSL3</i>        | Intrachromosomal | 19         | 7                                 | 11                                                 |

n.d.: not determined.

**Table S3.** Paired chimeric reads for *MUC1-TRIM46* identified from TCGA database. These 25 reads were obtained from nine patient samples. These nine patient sample IDs are: TCGA-04-1348, TCGA-10-0931, TCGA-13-0720, TCGA-13-1403, TCGA-13-1482, TCGA-23-1122, TCGA-24-0979, TCGA-24-1560 and TCGA-24-1604.

| Read 1 (Aligning to MUC1 Gene)    | Read 2 (Aligning to TRIM46 Gene) |
|-----------------------------------|----------------------------------|
| CATTTCAAACCTCCAGTTTAATTCCTCTCTGGA | TGCGACAGGGAGGAAATAATGCGTCGAGGG   |
| AGATCCCAGCACCGACTACTACCAAGAGCTGC  | GGCATCCTCGGCCACCGCCCTGGTCCTCAGG  |
| AGAGAGACAT                        | CTTTCCTCGTACCT                   |
| CGAGTACCCACCTACCACACCCATGGGCGCT   | GAGGAAATAATGCGTCGAGGGGGGCATCCTC  |
| ATGTGCCCCCTAGCAGTACCGATCGTAGCCCC  | GGCCACCGCCCTGGTCCTCAGGCTTTCCTCGT |
| TATGAGAAGAG                       | ACCTGGTGCGTCT                    |
| GATACCTACCATCCTATGAGCGAGTACCCAC   | GCAGCGCCCTCTTGCGACAGGGAGGAAATA   |
| CTACCACACCCATGGGCGCTATGTGCCCCCTA  | ATGCGTCGAGGGGGGCATCCTCGGCCACCGCC |
| GCAGTACCGAT                       | CTGGTCCTCAGGCT                   |
| ATCCTATGAGCGAGTACCCACCTACCACACC   | TCGAGGGGGGCATCCTCGGCCACCGCCCTGGT |
| CATGGGCGCTATGTGCCCCCTAGCAGTACCGA  | CCTCAGGCTTTCCTCGTACCTGGTGCGTCTGC |
| TCGTAGCCCCCT                      | TGCCACTCTTCT                     |
| GAAGAATGCTTTTAATTCCTCTCTGGAAGATCC | AGGGGGCATCCTCGGCCACCGCCCTGGTCCT  |
| CAGCACCGACTACTACCAAGAGCTGCAGAGA   | CAGGCTTTCCTCGTACCTGGTGCGTCTGCTGC |
| GACATTTCTGA                       | CACTCATTTTCAG                    |
| ATCCTATGAGCGAGTACCCACCTACCACACC   | CCTGGACGCAGCGCCCTCTTGCGACAGGGAG  |
| CATGGGCGCTATGTGCCCCCTAGCAGTACCGA  | GAAATAATGCGTCGAGGGGGGCATCCTCGGCC |
| TCGTAGCCCCCT                      | ACCGCCCTGGTCC                    |
| CGGGATACCTACCATCCTATGAGCGAGTACCC  | GTCGAGGGGGGCATCCTCGGCCACCGCCCTGG |
| CACCTACCACACCCATGGGCGCTATGTGCCCC  | TCCTCAGGCTTTCCTCGTACCTGGTGCGTCTG |
| CTAGCAGTACC                       | CTGCCACTCTTC                     |
| GAATTAAACTGGAGTTTGAATGTGAAAAGA    | GGTACGAGGAAAGCCTGAGGACCAGGGCGG   |
| CAGGAAAAAGAAAGAGACCCCACTAGACAAC   | TGGCCGAGGATGCCCCCTCGACGCATTATTT  |
| TGGGGAGAAGTG                      | CCTCCCTGTCGCAA                   |
| GAGTACCCACCTACCACACCCATGGGCGCTA   | TCTCCTTTTCTCCTCTCAGTGCCTGGACGC   |
| TGTGCCCCCTAGCAGTACCGATCGTAGCCCCCT | AGCGCCCTCTTGCGACAGGGAGGAAATAAT   |
| ATGAGAAGAGT                       | GCGTCGAGGGGGC                    |

Table S3. *Cont.*

| Read 1 (Aligning to MUC1 Gene)                                                      | Read 2 (Aligning to TRIM46 Gene)                                                    |
|-------------------------------------------------------------------------------------|-------------------------------------------------------------------------------------|
| GTCAGTGCCGCCGAAAGAACTACGGGCAGCT<br>GGACATCTTCCAGCCCCGGGATACCTACCATC<br>CTATGAGCGAG  | GGACGCAGCGCCCTCTTGCGACAGGGAGGA<br>AATAATGCGTCGAGGGGGCATCCTCGGCCAC<br>CGCCCTGGTCCTCA |
| AGCTGGACATCTTCCAGCCCCGGGATACCTAC<br>CATCCTATGAGCGAGTACCCACCTACCACAC<br>CCATGGGCGCT  | GGAAATAATGCGTCGAGGGGGCATCCTCGG<br>CCACCGCCCTGGTCCTCAGGCTTTCCTCGTAC<br>CTGGTGCGTCTGC |
| CCACCTGGGGACAGGATGTCACCTCGGTCCCA<br>GTCACCAGGCCAGCCCTGGGCTCCACCACC                  | GCGCTCAGCGCTGCTTCTCCCTCTCTTTGTTG<br>TAGGCTGTGGCCACCGCGGACTCTGCTCCGG<br>AGCACCCAGG   |
| GTACCCACCTACCACACCCATGGGCGCTATG<br>TGCCCCCTAGCAGTACCGATCGTAGCCCTAT<br>GAGAAGAGTGG   | CTCTTGCGACAGGGAGGAAATAATGCGTCGA<br>GGGGGCATCCTCGGCCACCGCCCTGGTCCTC<br>AGGCTTTCCTCGT |
| GGCTACGATCGGTACTGCTAGGGGGCACATAG<br>CGCCATGGGTGTGGTAGGTGGGGTACTCGCT<br>CATAGGATGG   | TGCGTCGAGGGGGCATCCTCGGCCACCGCCC<br>TGGTCCTCAGGCTTTCCTCGTACCTGGTGCGT<br>CTGCTGCCACTC |
| TGCTTTTACATTTCAAACCTCCAGTTTAATTC<br>CTCTCTGGAAGATCCCAGCACCGACTACTACC<br>AAGAGCTGC   | GAAATAATGCGTCGAGGGGGCATCCTCGGCC<br>ACCGCCCTGGTCCTCAGGCTTTCCTCGTACCT<br>GGTGCGTCTGCT |
| ACCACACCCATGGGCGCTATGTGCCCCCTAGC<br>AGTACCGATCGTAGCCCCTATGAGAAGAGTGG<br>CAG         | AGGGAGGAAATAATGCGTCGAGGGGGCATC<br>CTCGGCCACCGCCCTGGTCCTCAGGCTTTCCT<br>CGTACCTGGTGCG |
| CCTACCACACCCATGGGCGCTATGTGCCCCCT<br>AGCAGTACCGATCGTAGCCCCTATGAGAAGAG<br>TGGCAG      | GCCCTCTTGCGACAGGGAGGAAATAATGCGT<br>CGAGGGGGCATCCTCGGCCACCGCCCTGGTC<br>CTCAGGCTTTCCT |
| CCATCCTATGAGCGAGTACCCACCTACCACA<br>CCCATGGGCGCTATGTGCCCCCTAGCAGTACC<br>GATCGTAGCCC  | CAGTGCCTGGACGCAGCGCCCTCTTGCGACA<br>GGGAGGAAATAATGCGTCGAGGGGGCATCC<br>TCGGCCACCGCCCT |
| ATGAGCGAGTACCCACCTACCACACCCATGG<br>GCGCTATGTGCCCCCTAGCAGTACCGATCGTA<br>GCCCTATGAG   | GTGAGGGGGCATCCTCGGCCACCGCCCTGG<br>TCTCAGGCTTTCCTCGTACCTGGTGCGTCTG<br>CTGCCACTCTTC   |
| ACAATGGCCAGCGCAACCAGAACACAGACCA<br>GCACCAGCAGCGCGATG                                | ATGCGTCGAGGGGGCATCCTCGGCCACCGCC<br>CTGGTCCTCAGGCTTTCCTCGTACCTGGTGCG<br>TCTGCTGCCACT |
| GTCTTTTACATTTCAAACCTCCAGTTTAATTC<br>TCTCTGGAAGATCCCAGCACCGACTACTACCA<br>AGAGCTGCA   | AATAATGCGTCGAGGGGGCATCCTCGGCCAC<br>CGCCCTGGTCCTCAGGCTTTCCTCGTACCTGG<br>TGCGTCTGCTGC |
| ACCATCCTATGAGCGAGTACCCACCTACCAC<br>ACCCATGGGCGCTATGTGCCCCCTAGCAGTAC<br>CGATCGTAGCC  | GGAGGAAATAATGCGTCGAGGGGGCATCCT<br>CGGCCACCGCCCTGGTCCTCAGGCTTTCCTC                   |
| CTACCCAGAGAAGTTCAGTGCCAGCTCTACT<br>GAGAAGAATGCTTTTAATTCCTCTCTGGAAGAT<br>CCCAGCACCG  | ATAATGCGTCGAGGGGGCATCCTCGGCCACC<br>GCCCTGGTCCTCAGGCTTTCCTCGTACCTGGT<br>GCGTCTGCTGCC |
| GACATCTTCCAGCCCCGGGATACCTACCATCCT<br>ATGAGCGAGTACCCACCTACCACACCCATGG<br>GCGCTATGTG  | GGAAATAATGCGTCGAGGGGGCATCCTCGG<br>CCACCGCCCTGGTCCTCAGGCTTTCCTCGTAC<br>CTGGTGCGTCTGC |
| CTCCAGTTTAATTCCTCTCTGGAAGATCCCAGC<br>ACCGACTACTACCAAGAGCTGCAGAGAGACA<br>TTTCTGAAATG | GCCTGGACGCAGCGCCCTCTTGCGACAGGGA<br>GGAAATAATGCGTCGAGGGGGCATCCTCGG<br>CCACCGCCCTGGTC |

**Table S4.** Primers used in this study.

| Primers                | Sequence 5'-> 3'                                                                    |
|------------------------|-------------------------------------------------------------------------------------|
| TRIM46-MUC1 F1         | AAGATCCCAGCACCGACTACT                                                               |
| TRIM46-MUC1 R1         | AGGGAGGAAATAATGCGTCCA                                                               |
| MUC1 fwd               | GCCCGCTCCACCTCTCAAGCAGCCAGCGCCTGCCTGAATCTGTTCT                                      |
| KRTCAP2 R9             | GTCAGTTTCTCTTCTTGCTCT                                                               |
| E-S-N muc1 fwd new     | GGCAAAGAATTCAATAATTAACCGCGGGCGGCCGCCCGCTCCACCTC<br>TCAAGCAGCCAGCGCCTGCCTGAATCTGTTCT |
| Bam-Stop-FLAG Muc1 rev | TTGGATCCCCTCATTACTTGTCTGTCATCGTCTTT<br>GTAGTCTTGAAGGCAGTGAGCGAGAACA                 |

**Table S5.** MUC1-TRIM46-KRTCAP2 isoforms and RNA fusion junctions. MUC1 sequence is in red, TRIM46 in blue and KRTCAP2 sequence is in green. Lowercase letters represent 5' and 3' UTR sequences. Start and stop codons are shown in Bold. "\*" Indicates fusion junction between MUC1 and TRIM46 while "^" indicates fusion junction between TRIM46 and KRTCAP2.

|                                                     |                                                                                                                                                                                                                                                                                                                                                                                                                                                                                                                                                                                                                                                                                                                                                                                                                                                                                                                                                                                                                                                                                                                                                                                                                                                                                                                           |
|-----------------------------------------------------|---------------------------------------------------------------------------------------------------------------------------------------------------------------------------------------------------------------------------------------------------------------------------------------------------------------------------------------------------------------------------------------------------------------------------------------------------------------------------------------------------------------------------------------------------------------------------------------------------------------------------------------------------------------------------------------------------------------------------------------------------------------------------------------------------------------------------------------------------------------------------------------------------------------------------------------------------------------------------------------------------------------------------------------------------------------------------------------------------------------------------------------------------------------------------------------------------------------------------------------------------------------------------------------------------------------------------|
| MUC1-TRIM46-<br>KRTCAP2 isoform 1<br>complete cDNA: | <p>acgtccacctcaagcagccagcgcctgctgaatctgttctgccccctccccaccattcaccaccacc<b>ATGACACCGG</b><br/> <b>GCACCCAGTCTCCTTTCTTCCCTGCTGCTGCTCCTCACAGTGCTTACAGCTACCACAG</b><br/> <b>CCCCTAAACCCGCAACAGTTGTTACGGGTTCTGGTCATGCAAGCTCTACCCAGGT</b><br/> <b>GGAGAAAAGGAGACTTCGGCTACCCAGAGAAGTTCAGTGCCAGCTCTACTGAGA</b><br/> <b>AGAATGCTTTGTCTACTGGGCTCTTTCTTTTTCTGTCTTTTACATTTCAAACCTC</b><br/> <b>CAGTTTAATTCCTCTCTGGAAGATCCCAGCACCGACTACTACCAAGAGCTGCAGAG</b><br/> <b>AGACATTTCTGAAATG*AGTGGC</b><br/> <b>AGCAGACGCACCAGGTACGAGGAAAGCCTGAGGACCAGGGCGGTGGCCGAGGAT</b><br/> <b>GCCCCCTCGACGCATTATTTCTCCCTGTCGCAAGAGGGCGCTGCGTCCAGGCACT</b><br/> <b>GAGAGGAAGAAAGAGGAGAACCGGAGGAGTAGCAAGTCCGCG^TGGTGGGTACG</b><br/> <b>GGCACCTCGCTGGCGCTCTCTCCCTCTGTCCCTGCTGCTTTTGGTGGGATGCAG</b><br/> <b>ATGTACAGCCGTCAGCTGGCCTCCACCGAGTGGCTCACCATCCAGGGCGGCCCTGCT</b><br/> <b>TGGTTCGGGTCTCTTCGTGTTCTCGCTCACTGCCTTCAATAA</b>tctggagaatctgtctttggcaaa<br/>           ggattccaagcaaatcttccctgagatttctctgtgctcctgttggctctctttgcatctggcctcatccaccgagctgtgtcaaca<br/>           cctgtctcatcttccatggttggctgtactacatcaacaagatctctccacctgtaccagcagctccagctctcacaccage<br/>           caaggtcacaggcaagagcaagaagagaactgacctgaatgttcaataaagttgattcttgt</p>                                                                                                           |
| MUC1-TRIM46-<br>KRTCAP2 isoform 2<br>complete cDNA: | <p>cgctccacctcaagcagccagcgcctgctgaatctgttctgccccctccccaccattcaccaccacc<b>ATGACACCGGG</b><br/> <b>CACCCAGTCTCCTTTCTTCCCTGCTGCTGCTCCTCACAGTGCTTACAGCTACCACAGC</b><br/> <b>CCCTAAACCCGCAACAGTTGTTACGGGTTCTGGTCATGCAAGCTCTACCCAGGTG</b><br/> <b>GAGAAAAGGAGACTTCGGCTACCCAGAGAAGTTCAGTGCCAGCTCTACTGAGAA</b><br/> <b>GAATGCTTTTAATTCCTCTCTGGAAGATCCCAGCACCGACTACTACCAAGAGCTGC</b><br/> <b>AGAGAGACATTTCTGAAATGGCTGCTGTCAAGTGCCGCCGAAAGAACTACGGGCA</b><br/> <b>GCTGGACATCTTCCAGCCCCGGGATACCTACCATCCTATGAGCGAGTACCCACCT</b><br/> <b>ACCACCCATGGGCGCTATGTGCCCCCTAGCAGTACCGATCGTAGCCCCTATGAG</b><br/> <b>AAG*AGTGGCAGCAGACGCACCAGGTACGAGGAAAGCCTGAGGACCAGGGCGGT</b><br/> <b>GGCCGAGGATGCCCCCTCGACGCATTATTTCTCCCTGTCGCAAGAGGGCGCTGCG</b><br/> <b>TCCAGGCACTGAGAGGAAGAAAGAGGAGAACCGGAGGAGTAGCAAGTCCGCG^T</b><br/> <b>GGTGGGTACGGCACCTCGCTGGCGCTCTCTCCCTCTGTCCCTGCTGCTCTTTGC</b><br/> <b>TGGGATGCAGATGTACAGCCGTCAGCTGGCCTCCACCGAGTGGCTCACCATCCAG</b><br/> <b>GGCGGCTGCTTGGTTCGGGTCTCTTCGTGTTCTCGCTCACTGCCTTCAATAA</b>tctggag<br/>           aatctgtctttggcaagattccaagcaaatcttccctgagatttctctgtgctcctgttggctctctttgcatctggcctcatca<br/>           ccagctctgtgtcaccacctgtctctctccatggttggctgtactacatcaacaagatctctccacctgtaccagcagcagct<br/>           ccagctctcacaccagcaaggtcacaggcaagagcaagaagagaactgacctgaatgttcaataaagttgattcttgt</p> |

Table S5. Cont.

|                                                                     |                                                                                                                                                                                                                                                                                                                                                                                                                                                                                                                                                                                                                                                                                                                                                                                                                                                                                                                                                                                                                                                                                                                                                                                                                                                                                                                                                                                                                                                           |
|---------------------------------------------------------------------|-----------------------------------------------------------------------------------------------------------------------------------------------------------------------------------------------------------------------------------------------------------------------------------------------------------------------------------------------------------------------------------------------------------------------------------------------------------------------------------------------------------------------------------------------------------------------------------------------------------------------------------------------------------------------------------------------------------------------------------------------------------------------------------------------------------------------------------------------------------------------------------------------------------------------------------------------------------------------------------------------------------------------------------------------------------------------------------------------------------------------------------------------------------------------------------------------------------------------------------------------------------------------------------------------------------------------------------------------------------------------------------------------------------------------------------------------------------|
| <p><i>MUC1-TRIM46-<br/>KRTCAP2 isoform 3</i><br/>complete cDNA:</p> | <p>cgctccacctcaagcagcagcgcctgctgaatctgttctgccccctccccaccattaccaccacc<b>ATGACACCGGG</b><br/> <b>CACCCAGTCTCCTTCTTCCTGCTGCTCCTCACAGTGCTTACAGTACCACAGC</b><br/> <b>CCCTAAACCCGCAACAGTTGTTACGGGTTCTGGTCATGCAAGCTCTACCCCAGGTG</b><br/> <b>GAGAAAAGGAGACTTCGGCTACCCAGAGAAGTTCAGTGCCACAGCTACTGAGAA</b><br/> <b>GAATGCTTTTAATTCCTCTCTGGAAGATCCCAGCACCGACTACTACCAAGAGCTGC</b><br/> <b>AGAGAGACATTTCTGAAATGTCTGGGGCTGGGGTGCCAGGCTGGGGCATCGCGCT</b><br/> <b>GCTGGTGCTGGTCTGTGTTCTGGTTGCGCTGGCCATTGTCTATCTCATTGCCTTGGCT</b><br/> <b>GTCTGTCAGTGCCGCCGAAAGAACTACGGGCAGCTGGACATCTTCCAGCCCCGGG</b><br/> <b>ATACCTACCATCCTATGAGCGAGTACCCACCTACCACACCCATGGGCGCTATGTG</b><br/> <b>CCCCCTAGCAGTACCGATCGTAGCCCCTATGAGAAG*AGTGGCAGCAGACGCACC</b><br/> <b>AGGTACGAGGAAAGCCTGAGGACCAGGGCGGTGGCCGAGGATGCCCCCTCGACG</b><br/> <b>CATTATTTCTCCCTGTGCAAGAGGGCGCTGCGTCCAGGCACTGAGAGGAAGAA</b><br/> <b>AGAGGAGAACCGGAGGAGTAGCAAGTCCGCG^TGGTGGGTACGGGCACCTCGCTG</b><br/> <b>CGCTCTCCTCCCTCCTGTCCCTGCTGCTCTTTGCTGGGATGCAGATGTACAGCCCT</b><br/> <b>CAGCTGGCCTCCACCGAGTGGCTACCATCCAGGGCGGCCTGTTGTTCCGGCTCT</b><br/> <b>CTTCGTGTTCTCGCTCACTGCCTTCAATAA</b>ctggagaatctgtctttggcaaggattccaagcaagatc<br/>         ttcctgagattctctgtgctcctgttggtctctttgcatctggcctcatccaccgagctctgtgtcaccacctgctcatcttctccatgg<br/>         ttggtctgtactacatcaacaagatctctccacctgtaccaggcagcagctccagctctcacaccagcaaggctcacaggcaaga<br/>         gcaagaagagaaactgacctgaatgttcaataaagttgattctttgt</p>                |
| <p><i>MUC1-TRIM46-<br/>KRTCAP2 isoform 4</i><br/>complete cDNA:</p> | <p>Gegcctgctgaatctgttctgccccctccccaccattaccaccaccatgacaccgggcaaccagctctcttctctctgtctgct<br/>         cctcacagtcttacaggtgagggcagaggtggggagtgggctgcctgcttaggtgttctctgtggtcttctgtgggttttggc<br/>         ccttgagatggcaccatgaagtaagctaccacagcccctaaaccgcaacagttgttacgggttctggtcatgcaagcttacc<br/>         caggtggagaaaaggagactcggctaccagagaagttagctgcccagctctactgagaagaatgctttaaactctctctggaag<br/>         atcccagcaccgactactaccaagagctgagagagacattctgaa<b>ATGTGA</b>gtgatgtgcaattcttctctgcccagct<br/>         gggctgggggtccaggctggggcatcgcctgctggtgctggtctgtctgtggtgctgctgcccattgtctatctcattgcttgg<br/>         ctgctgtcagtgcccgaaagaactcggcagctggacatctttccagcccgggatactaccatcctatgagcgagtaccca<br/>         ctaccacacctgggcgtatgtgccccctagcagtagcagctgtagcccctatgagaag*agtggcagcagcagcaccaggta<br/>         cgaggaaagcctgaggaccaggcggtggccgaggatcccctgacgcattattctcctctgcaagaggcgctgctgctc<br/>         caggcactgagaggaagaagaggagaacgagagtagcaagtccg^tggtgggtacgggcacctgctgctgctc<br/>         ctccctctgctcctgctctttgtctggatgagatgtacagccgctgctggcctccaccagtggtcaccatccaggcgggc<br/>         ctgctgtggttgggtctctctgtgtctgctcactgcctcaataatctggagaatctgtctttggcaaggattccaagcaagatct<br/>         cctgagattctctgtgctcctgttggctctttgcatctggcctcatccaccgagctgtgtcaccacctgctcatcttctccatgggt<br/>         ggtctgtactacatcaacaagatctctccacctgtaccaggcagcagctccagctctcacaccagcaaggctcacaggcaagagc<br/>         aagaagagaaactgacctgaatgttcaataaagttgattctttgt</p> |
| <p><i>MUC1-TRIM46-<br/>KRTCAP2 isoform 5</i><br/>complete cDNA:</p> | <p>ataattaaccgcccggcgccgctccacctcaagcagccagcgcctgctgaatctgttctgccccctccccaccattaccac<br/>         ccacc<b>ATGACACCGGGCACCCAGTCTCCTTCTTCCTGCTGCTCCTCACAGTGCTT</b><br/> <b>ACAGTTGTTACGGGTTCTGGTCATGCAAGCTCTACCCAGGTGGAGAAAAGGAGA</b><br/> <b>CTTCGGCTACCCAGAGAAGTTCAGTGCCAGCTCTACTGAGAAGAATGCTGCTGTC</b><br/> <b>TGTCAGTGCCGCCGAAAGAACTACGGGCAGCTGGACATCTTCCAGCCCCGGGATA</b><br/> <b>CCTACCATCCTATGAGCGAGTACCCACCTACCACACCCATGGGCGCTATGTGCC</b><br/> <b>CCTAGCAGTACCGATCGTAGCCCCTATGAGAAG*AGTGGCAGCAGACGCACCAGG</b><br/> <b>TACGAGGAAAGCCTGAGGACCAGGGCGGTGGCCGAGGATGCCCCCTCGACGCATT</b><br/> <b>ATTTCTCCCTGTGCAAGAGGGCGCTGCGTCCAGGCACTGAGAGGAAGAAAGAG</b><br/> <b>GAGAACCGGAGGATAGCAAGTCCGCG^TGGTGGGTACGGGCACCTCGCTGGCGC</b><br/> <b>TCTCCTCCCTCCTGTCCCTGCTCTTTGCTGGGATGCAGATGTACAGCCCTCAGC</b><br/> <b>TGGCCTCCACCGAGTGGCTACCATCCAGGGCGGCCTGCTGGTTCGGGTCTCTCC</b><br/> <b>TGTTCTCGCTCACTGCCTTCAATAA</b>ctggagaatctgtctttggcaaggattccaagcaagatcttccctga<br/>         gattctctgtgctcctgttggtctctttgcatctggcctcatccaccgagctgtgtcaccacctgctcatcttctccatgggtgtg<br/>         tactacatcaacaagatctctccacctgtaccaggcagcagctccagctctcacaccagcaaggctcacaggcaagagcaaga<br/>         gagaactgacctgaatgttcaataaagttgattctttgt</p>                                                                                                                                                                                                                                      |

**Table S5. Cont.**

|                                                            |                                                                                                                                                                                                                                                                                                                                                                                                                                                                                                                                                                                                                                                                                                                                                                                                                                                                                                                                                                                                                                                                                                                                                                                                                                                                                                                                                                                                                                                                                                                                                                                                                           |
|------------------------------------------------------------|---------------------------------------------------------------------------------------------------------------------------------------------------------------------------------------------------------------------------------------------------------------------------------------------------------------------------------------------------------------------------------------------------------------------------------------------------------------------------------------------------------------------------------------------------------------------------------------------------------------------------------------------------------------------------------------------------------------------------------------------------------------------------------------------------------------------------------------------------------------------------------------------------------------------------------------------------------------------------------------------------------------------------------------------------------------------------------------------------------------------------------------------------------------------------------------------------------------------------------------------------------------------------------------------------------------------------------------------------------------------------------------------------------------------------------------------------------------------------------------------------------------------------------------------------------------------------------------------------------------------------|
| <p><i>MUC1-TRIM46-KRTCAP2</i> isoform 6 complete cDNA:</p> | <p>Cgctccacctcaagcagccagcgcctgctgaatctgttctgccccctccccaccatttcaccaccaccatgacaccgggcacc<br/> agttctctttctctctgctgctctcacagtgttacagctaccacagcccctaaaccgcaacagttgttacgggtctggtcatgc<br/> aagctctaccccaggtggagaaaaggagacttggctaccagagaagttcagtgcccagctctactgagaagaatgctatcccag<br/> caccgactactaccaagagctgcagagagacatttctgaa<b>ATGTTTTTGCAGATTTATAAACAAGGGGGT</b><br/> <b>TTTCTGGGCCTCTCCAATATTAAGTTCAGGCCAGGATCTGTGGTGGTACAATTGACT</b><br/> <b>CTGGCCTTCGAGAAGGTACCATCAATGTCCACGACGTGGAGACACAGTTCAATC</b><br/> <b>AGTATAAACGGAAGCAGCCTCTCGATATAACCTGACGATCTCAGACGTCAGCGT</b><br/> <b>GAGTGATGTGCCATTTCTTTCTCTGCCAGTCTGGGGCTGGGGTGCCAGGCTGGG</b><br/> <b>GCATCGCGCTGCTGGTGTGGTCTGTGTTCTGGTTGCGCTGGCCATTGTCTATCTCAT</b><br/> <b>TGCCTTGGGTGTCTGTCTGAGTCCCGCCAAAGAAGTACGGGCAGCTGGACATCTTTC</b><br/> <b>CAGCCCGGGATACCTACCATCCTATGAGCGAGTACCCACCTACCACACCCATGG</b><br/> <b>GCGCTATGTGCCCCCTAGCAGTACCGATCGTAGCCCCTATGAGAAG*AGTGGCAGC</b><br/> <b>AGACGCACCAGGTACGAGGAAAGCCTGAGGACCAGGGCGGTGGCCGAGGATGCC</b><br/> <b>CCCTCGACGCATTATTTCTCCCTGTCGCAAGAGGGCGCTGCGTCCAGGCAGTGG</b><br/> <b>AGGAAGAAAGAGGAGAACGCGAGGAGTAGCAAGTCCGCG*TGTTGGGTACGGGC</b><br/> <b>ACCTCGCTGGCGCTCTCTCCCTCCTGCTCCCTGCTGCTCTTTGCTGGGATGCAGATG</b><br/> <b>TACAGCCGTCAGCTGGCCTCCACCGAGTGGCTCACCATCCAGGGCGGCCTGCTTGG</b><br/> <b>TTGGGTCTCTTCGTGTTCTCGTCACTGCCTTCAATAA</b>ctggagaatctgtctttggcaaggatt<br/> ccaagcaagatcttccctgagattctctgtgctctgttggctctttgcatctggcctcatccaccagctgtgtcaccactgct<br/> tcattctccatggttggtctgtactacatcaacaagatctctccacctgtaccaggcagcagctccagctctcaccagccaagg<br/> tcacaggcaagagcaagaagagaaactgacctgaatgttcaataaagttgattctttgt</p> |
|------------------------------------------------------------|---------------------------------------------------------------------------------------------------------------------------------------------------------------------------------------------------------------------------------------------------------------------------------------------------------------------------------------------------------------------------------------------------------------------------------------------------------------------------------------------------------------------------------------------------------------------------------------------------------------------------------------------------------------------------------------------------------------------------------------------------------------------------------------------------------------------------------------------------------------------------------------------------------------------------------------------------------------------------------------------------------------------------------------------------------------------------------------------------------------------------------------------------------------------------------------------------------------------------------------------------------------------------------------------------------------------------------------------------------------------------------------------------------------------------------------------------------------------------------------------------------------------------------------------------------------------------------------------------------------------------|

**Table S6.** Frequency of occurrence of different MUC1-TRIM46-KRTCAP2 isoforms determined using in-house HGSC samples. RT-PCR data from Figure 3A was utilized for densitometric analysis and then the samples positive for each isoform were determined.

| <b>MUC1-KRTCAP2 Isoform</b> | <b>Frequency of Occurrence among 59 HGSC Samples</b> |
|-----------------------------|------------------------------------------------------|
| Isoform 1                   | 64%                                                  |
| Isoform 2                   | 47%                                                  |
| Isoform 3                   | 17%                                                  |
| Isoform 4                   | 34%                                                  |
| Isoform 5                   | 34%                                                  |
| Isoform 6                   | 20%                                                  |

For Isoform 1, the following HGSC samples are considered positive: S4,5,7,11,12,14,15,16,20,21,22,23, 46,49,50,51,52,53,54,57,58,60,61,62,63,64,65,66,67,70,71,72,73,74; For Isoform 2, the following samples are considered positive: S1,2,3,4,5,7,9,11,12,15,23,49,53,54,55,61,62,63,64,65,66,67,71,73,74,75,78,82; For Isoform 3, the following samples are considered positive: S46,49,53,55,61,62,63,71,73,75; For Isoform 4, the following samples are considered positive: S1,3,4,5,7,12,15,20,23,46,49,52,55,57,61,62,72,73,75,82; For Isoform 5, the following samples are considered positive: S1,3,4,5,7,12,15,20,23,46,49,52,55,57,61, 62,72,73,75,82; For Isoform 6, the following samples are considered positive: S1,5,12,46,49,55,61,62,72, 73,75,82.

**Table S7.** MUC1-TRIM46-KRTCAP2 isoforms protein sequence. MUC1 sequence is in red, TRIM46 in blue and KRTCAP2 sequence is in green. "\*" Indicates fusion junction between MUC1 and TRIM46 while "^" indicates fusion junction between TRIM46 and KRTCAP2.

|                                                                                                                         |                                                                                                                                                                                                                                                                                                |
|-------------------------------------------------------------------------------------------------------------------------|------------------------------------------------------------------------------------------------------------------------------------------------------------------------------------------------------------------------------------------------------------------------------------------------|
| Isoform 1: 210 aa                                                                                                       | MTPGTQSPFFLLLLLTVLTATTAPKPATVVTGSGHASSTPGGEKETSATQRSSVPSSTEKNAL<br>STGVSFFFLSFHISNLQFNSSLEDPSTDYQELQRDISEM*SGSRRTRYEESLRTRAVAEDAPST<br>HYFLPVARGRCVQALRGRKRRTRGVASPR^GGYGHLAGALLPPVPAALCWDADVQPSAG<br>LHRVAHHPGRPAWFGSLRVLAHCLQ                                                                |
| Isoform 2: 242 aa                                                                                                       | MTPGTQSPFFLLLLLTVLTATTAPKPATVVTGSGHASSTPGGEKETSATQRSSVPSSTEKNAF<br>NSSLEDPSTDYQELQRDISEMAVCQCRKNYQLDIFPARDTYHPMSEYPTYHTHGRYVP<br>PSSTDRSPYEK*SGSRRTRYEESLRTRAVAEDAPSTHYFLPVARGRCVQALRGRKRRTRGVAS<br>PR^GGYGHLAGALLPPVPAALCWDADVQPSAGLHRVAHHPGRPAWFGSLRVLAHCLQ                                  |
| Isoform 3: 272 aa                                                                                                       | MTPGTQSPFFLLLLLTVLTATTAPKPATVVTGSGHASSTPGGEKETSATQRSSVPSSTEKNAF<br>NSSLEDPSTDYQELQRDISEMSGAGVPGWGIALLVLCVLVALAIVYLIALAVCQCRKNY<br>QLDIFPARDTYHPMSEYPTYHTHGRYVPPSSTDRSPYEK*SGSRRTRYEESLRTRAVAEDAP<br>STHYFLPVARGRCVQALRGRKRRTRGVASPR^GGYGHLAGALLPPVPAALCWDADVQPSA<br>GLHRVAHHPGRPAWFGSLRVLAHCLQ |
| Isoform 4: It is predicted to yield no protein since the annotated start codon is immediately followed by a stop codon. |                                                                                                                                                                                                                                                                                                |
| Isoform 5: 210 aa                                                                                                       | MTPGTQSPFFLLLLLTVLTVVTGSGHASSTPGGEKETSATQRSSVPSSTEKNAAVCQCRKN<br>YQLDIFPARDTYHPMSEYPTYHTHGRYVPPSSTDRSPYEK*SGSRRTRYEESLRTRAVAEDA<br>PSTHYFLPVARGRCVQALRGRKRRTRGVASPR^GGYGHLAGALLPPVPAALCWDADVQPS<br>AGLHRVAHHPGRPAWFGSLRVLAHCLQ                                                                 |
| Isoform 6: 263 aa                                                                                                       | MFLQIYKQGGFLGSLNFKFRPGSVVQLTAFREGTINVHDVETQFNQYKTEAASRYNLTIS<br>DVSVDVFPFSAQSGAGVPGWGIALLVLCVLVALAIVYLIALAVCQCRKNYQLDIFPA<br>RDYHPMSEYPTYHTHGRYVPPSSTDRSPYEK*SGSRRTRYEESLRTRAVAEDAPSTHYFLPV<br>ARGRCVQALRGRKRRTRGVASPR^GGYGHLAGALLPPVPAALCWDADVQPSAGLHRVA<br>HHPGRPAWFGSLRVLAHCLQ              |

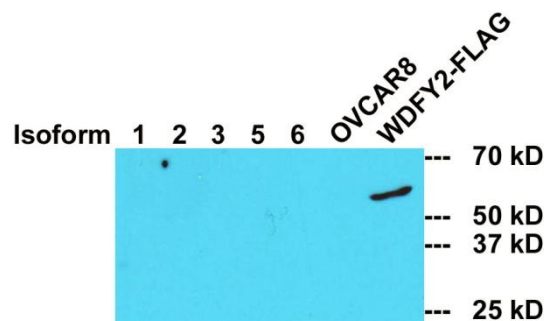

**Figure S1.** MUC1-TRIM46-KRTCAP2 isoforms are not secreted into the cellular media. MUC1-TRIM46-KRTCAP2 cDNA constructs with FLAG tag were transfected into OVCAR8. 48 hours after transfection, the cellular media was collected and was analyzed by western blotting with a FLAG antibody. None of the isoforms are detectable in the cellular media. WDFY2-FLAG is used as a positive control for the western blot.

© 2015 by the authors; licensee MDPI, Basel, Switzerland. This article is an open access article distributed under the terms and conditions of the Creative Commons by Attribution (CC-BY) license (<http://creativecommons.org/licenses/by/4.0/>).

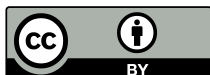

Supplement: cancers-07-00878-s001.pdf [file cancers-07-00878-s001.pdf]
